# Supplementary material
Source: PubMed Central journal article supplement (PMC9522924)

**A**

Peripheral CD8+ T cell Reconstitution

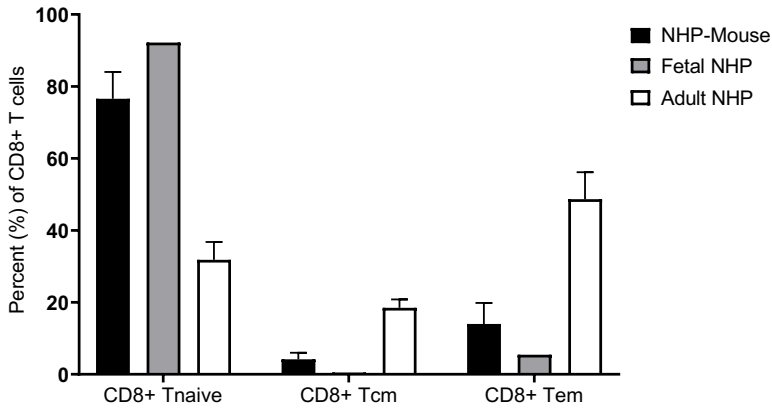

Peripheral CD4+ T cell Reconstitution

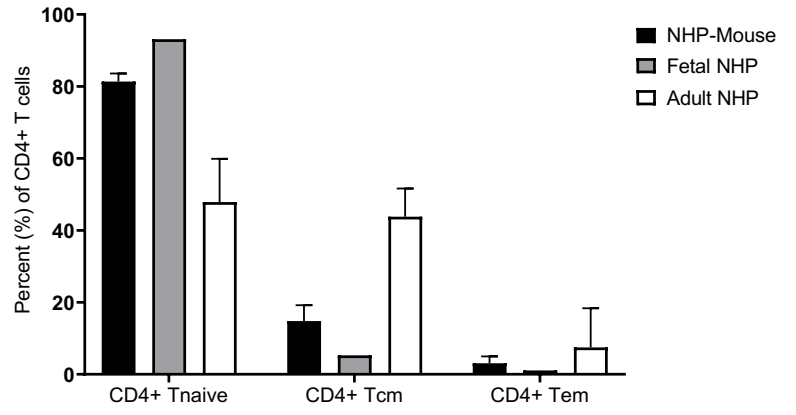

**B**

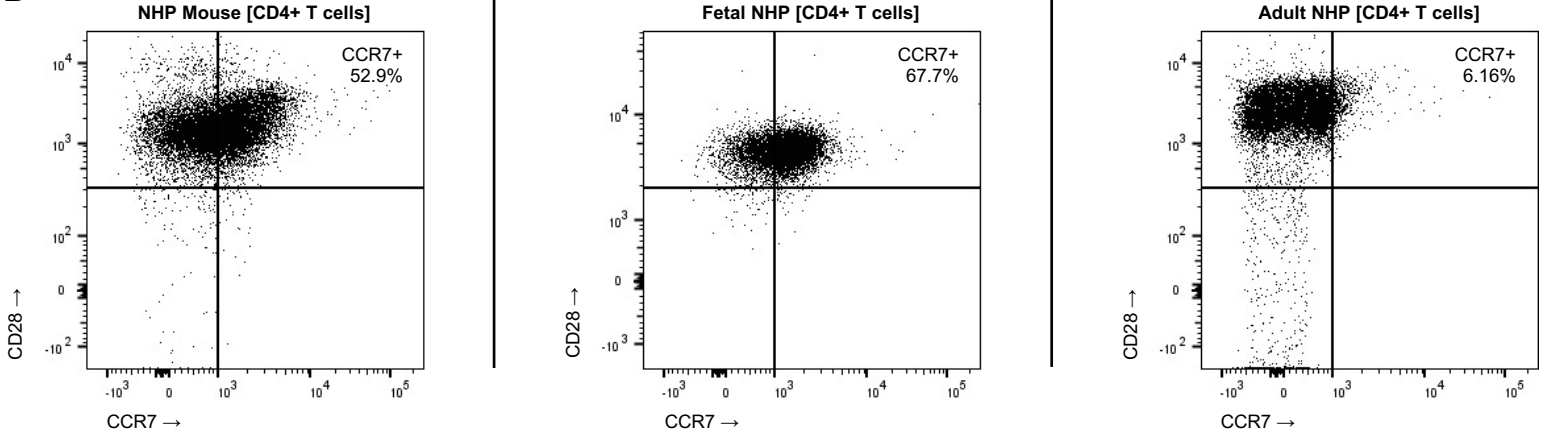

**C**

Peripheral CD20+ B cell Reconstitution

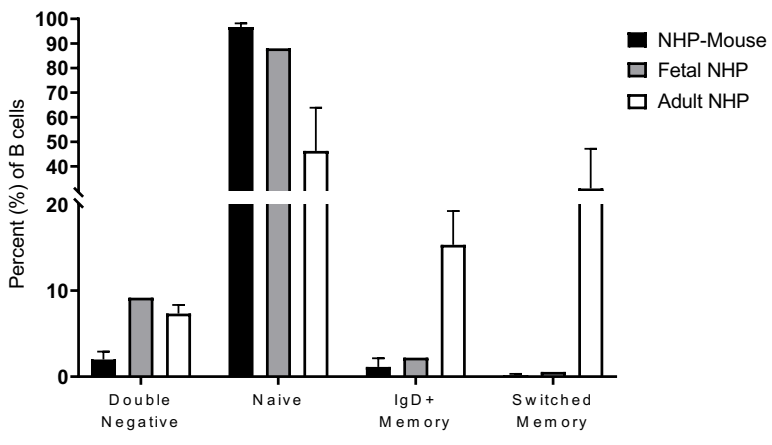

Supplement: NIHMS1788135-supplement-fS2.pdf [file NIHMS1788135-supplement-fS2.pdf]
