# Supplementary material
Source: PubMed Central journal article supplement (PMC9522924)
Supplement: NIHMS1788135-supplement-fS4.pdf [file NIHMS1788135-supplement-fS4.pdf]

| <u>Rhesus Fetal Donor</u> | <u># of Thymus Fragments Generated</u> |
|---------------------------|----------------------------------------|
| 1                         | 10                                     |
| 2                         | 5                                      |
| 3                         | 19                                     |
| 4                         | 7                                      |
| 5                         | 25                                     |
| 6                         | 22                                     |
| 7                         | 6                                      |
| 8                         | 7                                      |
| 9                         | 15                                     |
| <b>Mean # per Donor</b>   | <b>13</b>                              |
| <b>SD</b>                 | <b>8</b>                               |
