# Supplementary material
Source: PubMed Central journal article supplement (PMC9522924)

**A**

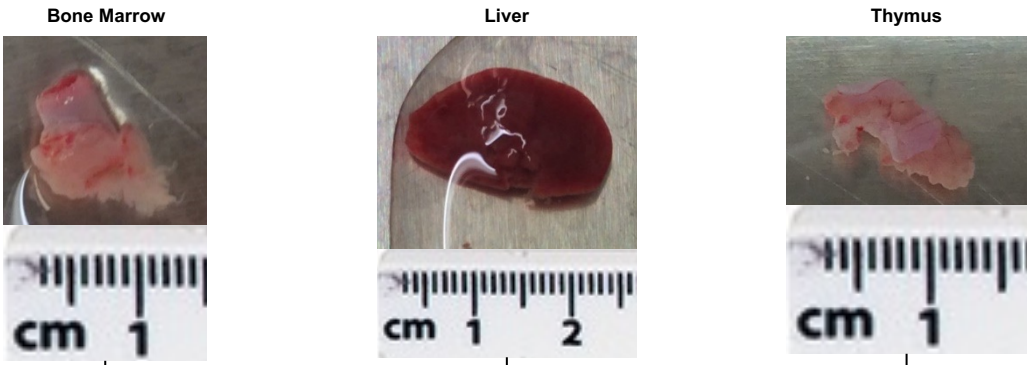

Single Cell Suspension

Single Cell Suspension

Single Cell Suspension

**B**

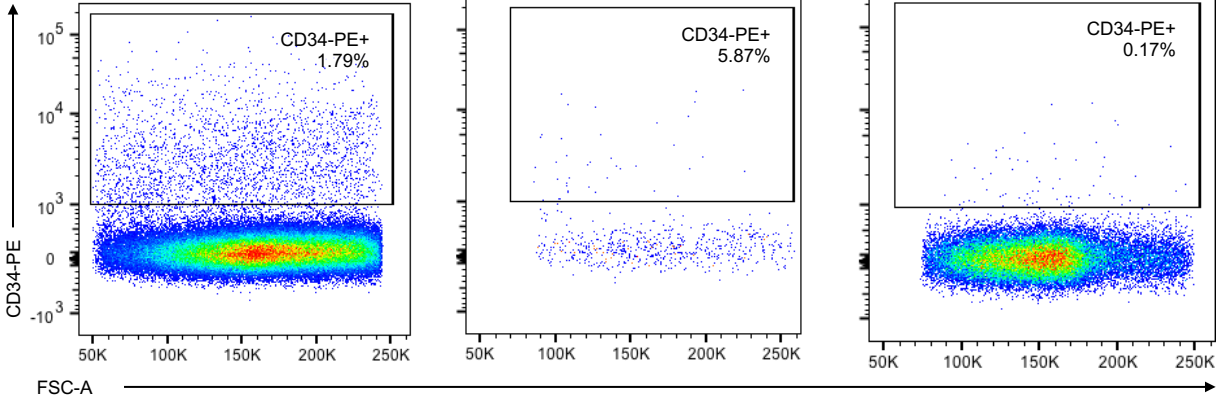

**C**

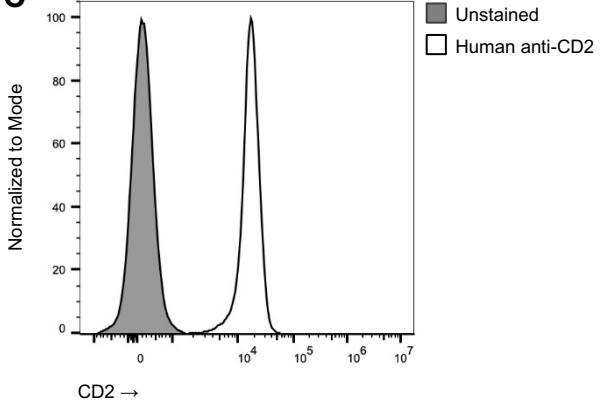

Supplement: NIHMS1788135-supplement-fS1.pdf [file NIHMS1788135-supplement-fS1.pdf]

A

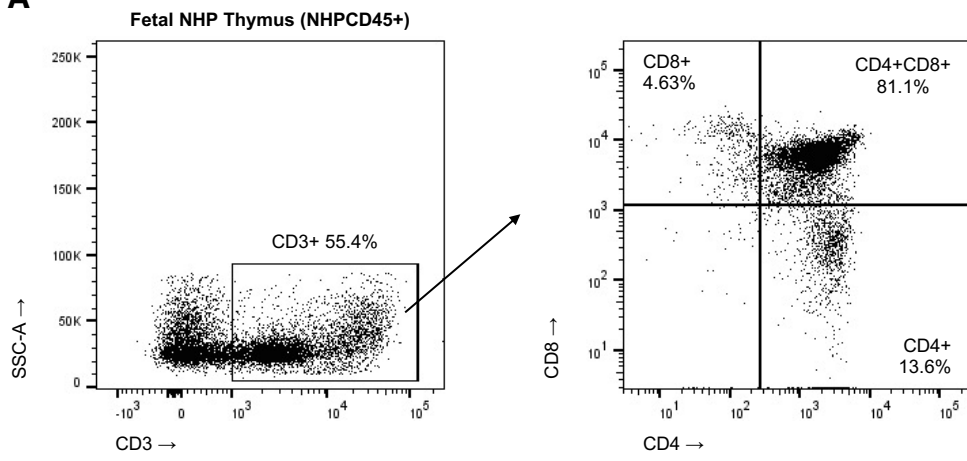

B

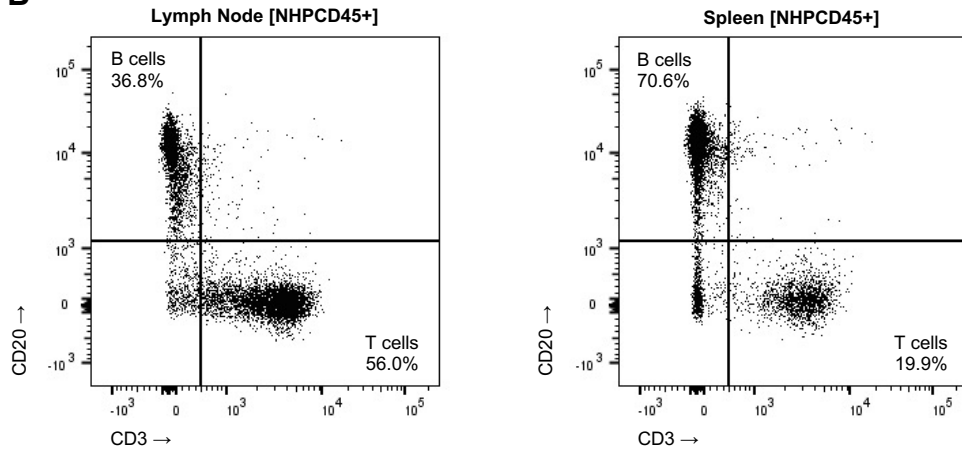

C

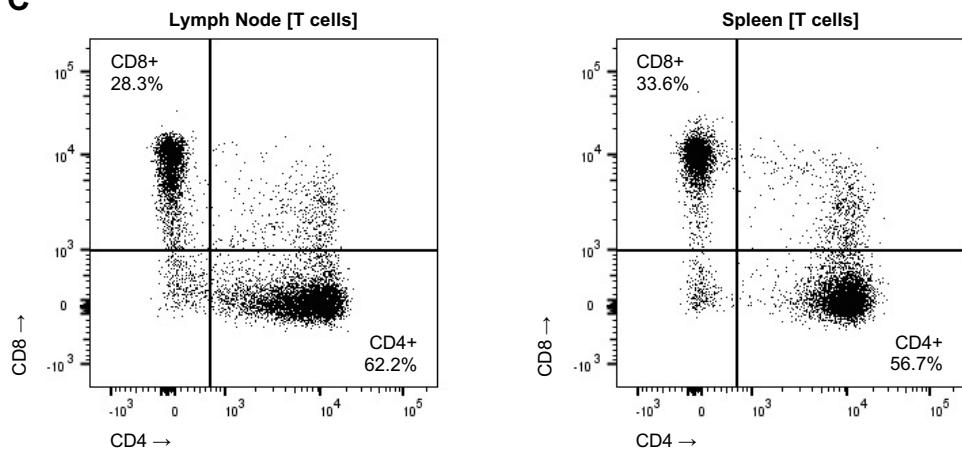

D

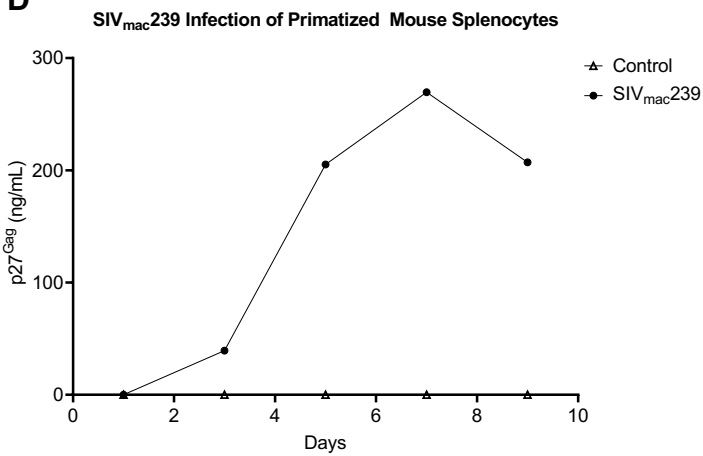

Supplement: NIHMS1788135-supplement-fS3.pdf [file NIHMS1788135-supplement-fS3.pdf]
